# Supplementary material for: Tear film proteome in age-related macular degeneration
Source: Springer Nature journal article supplement (doi:10.1007/s00417-018-3984-y), 2018-04-25
Supplement: MOESM3 [file 15718040]

## Tear film proteome in age-related macular degeneration.

Mateusz Winiarczyk<sup>1</sup>, Kai Kaarniranta<sup>2</sup>, Stanisław Winiarczyk<sup>3</sup>, Łukasz Adaszek<sup>3</sup>, Dagmara Winiarczyk<sup>3</sup>, Jerzy Mackiewicz\*<sup>1</sup>

1. Department of Vitreoretinal Surgery, Medical University of Lublin
2. Department of Ophthalmology, University of Eastern Finland and Kuopio University Hospital, Kuopio, Finland
3. Department of Epizootiology, University of Life Sciences of Lublin

\*mateuszwiniarczyk@umlub.pl, 20-079 Lublin, ul. Chmielna 1, Poland, tel./fax: +48 81 53 40 251

Supplementary table 3 - Dry AMD patients identified proteins

| Protein Name                                        | Score | Mass  | Matches | Access no. |
|-----------------------------------------------------|-------|-------|---------|------------|
| Serum albumin                                       | 207   | 71.3  | 10      | P02768     |
| Zinc-alpha-2-glycoprotein                           | 116   | 34.5  | 13      | P25311     |
| Bromodomain testis-specific protein                 | 80    | 108.5 | 18      | Q58F21     |
| Unconventional myosin-Ih                            | 78    | 120   | 19      | Q8N1T3     |
| Endothelial differentiation-related factor 1        | 78    | 16.4  | 8       | O60869     |
| Lipocalin-1                                         | 76    | 19.4  | 9       | P31025     |
| Protein SSX2                                        | 75    | 21.7  | 8       | Q16385     |
| Actin, cytoplasmic 1                                | 74    | 42.1  | 9       | P60709     |
| Unconventional myosin-Ih                            | 73    | 120   | 21      | Q8N1T3     |
| tetratricopeptide repeat protein                    | 73    | 19.4  | 8       | P31025     |
| Integrator complex subunit 6                        | 72    | 101   | 11      | Q9UL03     |
| A-kinase anchor protein 4                           | 70    | 95.8  | 10      | Q5JQC9     |
| Integrator complex subunit 6                        | 69    | 101   | 11      | Q9UL03     |
| Uncharacterized protein C1orf122                    | 68    | 11.5  | 7       | Q6ZSJ8     |
| Grainyhead-like protein 3 homolog                   | 67    | 71    | 8       | Q8TE85     |
| Integrator complex subunit 6                        | 67    | 101   | 12      | Q9UL03     |
| Speedy protein A                                    | 66    | 39.8  | 9       | Q6IBS0     |
| Shootin-1                                           | 66    | 72.1  | 11      | A0MZ66     |
| Prolactin-inducible protein                         | 66    | 16.8  | 7       | P12273     |
| Guanine nucleotide-binding protein subunit alpha-11 | 66    | 42.4  | 10      | P29992     |
| Prolactin-inducible protein                         | 66    | 16.8  | 6       | P12273     |
| Integrator complex submit6                          | 65    | 101   | 11      | Q9UL03     |
| Exocyst complex component 8                         | 65    | 82.4  | 15      | Q8IYI6     |

| Protein Name                                                                 | Score | Mass  | Matches | Access no. |
|------------------------------------------------------------------------------|-------|-------|---------|------------|
| Desmin                                                                       | 65    | 53.6  | 9       | P17661     |
| SRC kinase signaling inhibitor                                               | 65    | 112.7 | 15      | Q9C0H9     |
| tRNA-dihydrouridine(20) synthase [NAD(P)+]-like                              | 64    | 55.8  | 11      | Q9NX74     |
| AP-2 complex subunit alpha-1                                                 | 64    | 108.6 | 7       | O95782     |
| Ferritin heavy polypeptide-like 17                                           | 64    | 21.4  | 8       | Q9BXU8     |
| Prolactin-inducible protein                                                  | 64    | 16.8  | 9       | P12273     |
| Dynein heavy chain 17, axonemal                                              | 64    | 515.3 | 26      | Q9UFH2     |
| Dynein heavy chain 17, axonemal                                              | 63    | 515.3 | 32      | Q9UFH2     |
| Kinesin-like protein KIF28P                                                  | 63    | 109.1 | 12      | B7ZC32     |
| Uncharacterized protein C10orf111                                            | 62    | 17.9  | 5       | Q8N326     |
| Neurofilament medium polypeptide                                             | 62    | 102.5 | 14      | Q8NA69     |
| Carbonyl reductase [NADPH] 3                                                 | 62    | 31.2  | 8       | O75828     |
| Centromere/kinetochore protein zw10 homolog                                  | 62    | 89.6  | 19      | O43264     |
| Kinesin-like protein KIF28P                                                  | 61    | 109.1 | 13      | B7ZC32     |
| Bloom syndrome protein                                                       | 61    | 160.6 | 14      | P54132     |
| Speedy protein A                                                             | 61    | 37.1  | 7       | Q5MJ70     |
| NADH dehydrogenase [ubiquinone] 1 alpha subcomplex subunit 10                | 61    | 41.1  | 10      | O95299     |
| Alkaline phosphatase, tissue-nonspecific isozyme                             | 61    | 57.6  | 8       | P05186     |
| Putative uncharacterized protein C19orf81                                    | 61    | 22.7  | 5       | C9J6K1     |
| Rho GTPase-activating protein 24                                             | 61    | 84.8  | 14      | Q8N264     |
| Allograft inflammatory factor 1                                              | 60    | 16.7  | 6       | P55008     |
| Chondroitin sulfate N-acetylgalactosaminyltransferase 1                      | 60    | 61.8  | 9       | Q8TDX6     |
| Hsp90 co-chaperone Cdc37-like 1                                              | 60    | 39.3  | 9       | Q7L3B6     |
| Uncharacterized protein C2orf61 homolog                                      | 60    | 27.7  | 5       | Q9DAG5     |
| NADH dehydrogenase [ubiquinone] 1 alpha subcomplex subunit 10, mitochondrial | 60    | 41.1  | 10      | O95299     |
| A-kinase anchor protein 4                                                    | 60    | 95.8  | 13      | Q5JQC9     |
| Tetratricopeptide repeat protein 34                                          | 60    | 61.8  | 9       | A8MYJ7     |
| Calpain-7                                                                    | 60    | 93.3  | 16      | Q9Y6W3     |
| Lipocalin-1                                                                  | 60    | 19.4  | 8       | P31025     |
| Putative uncharacterized protein SSBP3-AS1                                   | 59    | 11    | 4       | Q7Z2R9     |
| Cytoplasmic dynein 1 light intermediate chain 1                              | 59    | 56.8  | 8       | Q9Y6G9     |
| Blood vessel epicardial substance                                            | 59    | 41.9  | 7       | Q8NE79     |

| Protein Name                                          | Score | Mass  | Matches | Access no. |
|-------------------------------------------------------|-------|-------|---------|------------|
| Myc proto-oncogene protein                            | 59    | 49.3  | 10      | P01106     |
| Endothelin-converting enzyme 1                        | 59    | 87.9  | 8       | P42892     |
| Leucine-rich repeat-containing protein 16A            | 59    | 152.7 | 17      | Q5VZK9     |
| Alkyldihydroxyacetonephosphate synthase, peroxisomal  | 59    | 73.7  | 10      | O00116     |
| Trafficking protein particle complex subunit 1        | 59    | 16.9  | 8       | Q9Y5R8     |
| Chromobox protein homolog 2                           | 58    | 56.4  | 8       | Q14781     |
| Kinesin-like protein KIF28P                           | 58    | 109.1 | 12      | B7ZC32     |
| Ribosomal protein S6 kinase alpha-3                   | 58    | 84    | 10      | P51812     |
| Methyltransferase-like protein 2B                     | 58    | 44.1  | 9       | Q6P1Q9     |
| Aldo-keto reductase family 1 member B10               | 58    | 36.2  | 8       | O60218     |
| Chondroitin sulfate N-acetylgalactosaminyltransferase | 58    | 61.8  | 9       | Q8TDX6     |
| Kinesin-like protein KIF28P                           | 58    | 109.1 | 10      | B7ZC32     |
| Fibroblast growth factor 9                            | 57    | 23.5  | 4       | P31371     |
| Rap guanine nucleotide exchange factor 2              | 57    | 168.2 | 17      | Q9Y4G8     |
| Cell differentiation protein RCD1 homolog             | 57    | 34    | 9       | Q92600     |
| Tetratricopeptide repeat protein 34                   | 57    | 61.8  | 11      | A8MYJ7     |
| Sulfhydryl oxidase 2                                  | 57    | 78.2  | 11      | Q6ZRP7     |
| ,                                                     | 57    | 61.8  | 10      | A8MYJ7     |
| Multimerin                                            | 57    | 139.2 | 13      | Q13201     |
| cGMP-dependent protein kinase 2                       | 57    | 88.1  | 10      | Q13237     |
| Zinc finger and SCAN domain-containing protein 31     | 57    | 48.2  | 5       | Q96LW9     |
| Bloom syndrome protein                                | 56    | 160.6 | 15      | P54132     |
| Intraflagellar transport protein 140 homolog          | 56    | 166.9 | 16      | Q96RY7     |
| Uncharacterized protein C19orf45                      | 56    | 58    | 7       | Q8NA69     |
| Sterile alpha motif domain-containing protein         | 56    | 19.4  | 6       | Q5TGI4     |
| Desmin                                                | 56    | 53.6  | 7       | P17661     |
| Glycine amidinotransferase, mitochondrial             | 56    | 48.9  | 9       | P50440     |
| Round spermatid basic protein 1                       | 56    | 90.9  | 10      | Q5VWQ0     |
| Zona pellucida sperm-binding protein 2                | 56    | 83.5  | 9       | Q05996     |
| F-box/WD repeat-containing protein 1A                 | 56    | 70.2  | 10      | Q9Y297     |

| Protein Name                                                                 | Score | Mass  | Matches | Access no. |
|------------------------------------------------------------------------------|-------|-------|---------|------------|
| Peroxiredoxin-1                                                              | 56    | 22.3  | 8       | Q06830     |
| LINE-1 retrotransposable element ORF2 protein                                | 56    | 150   | 10      | O00370     |
| WD repeat-containing and planar cell polarity effector protein fritz homolog | 56    | 86.2  | 11      | O95876     |
| Desmin                                                                       | 55    | 53.6  | 9       | P17661     |
| Zinc finger and SCAN domain-containing protein 5A                            | 55    | 56.9  | 9       | Q9BUG6     |
| C-type lectin domain family 2 member L                                       | 55    | 24.4  | 5       | P0C7M8     |
| Pyruvate kinase PKM                                                          | 55    | 58.5  | 5       | P14618     |
| Nucleoside diphosphate-linked moiety X motif 6                               | 55    | 36    | 9       | P53370     |
| Elongation factor Ts, mitochondrial                                          | 55    | 35.7  | 6       | P43897     |
| Rab GTPase-binding effector protein 2                                        | 54    | 64    | 9       | Q9H5N1     |
| ZN624_HUMAN                                                                  | 54    | 102.5 | 15      | Q9P2J8     |
| Lipocalin-1                                                                  | 54    | 19.4  | 6       | P31025     |
| Armadillo repeat-containing protein 4                                        | 53    | 117.1 | 12      | Q5T2S8     |
| Aldo-keto reductase family 1 member B10                                      | 53    | 36.2  | 7       | O60218     |
| Neurofilament medium polypeptide                                             | 53    | 58    | 9       | Q8NA69     |
| 5'-AMP-activated protein kinase subunit gamma-2                              | 53    | 63.2  | 8       | Q9UGJ0     |
| Zinc finger MYND domain-containing protein 15                                | 53    | 82.7  | 12      | Q9H091     |
| 5'-AMP-activated protein kinase subunit gamma-2                              | 53    | 63.2  | 8       | Q9UGJ0     |
| Desmin                                                                       | 53    | 53.6  | 12      | P17661     |
| Vitamin D-binding protein                                                    | 53    | 54.5  | 8       | P02774     |
| Tetratricopeptide repeat protein                                             | 52    | 61.8  | 9       | A8MYJ7     |
| Uncharacterized protein C19orf45                                             | 52    | 58    | 6       | Q8NA69     |
| Bloom syndrome protein                                                       | 52    | 160.6 | 13      | P54132     |
| Zinc finger protein 780A                                                     | 52    | 76.6  | 10      | O75290     |
| Histatin-3                                                                   | 52    | 6.1   | 5       | P15516     |
| Tyrosine-protein kinase Fer                                                  | 51    | 95.2  | 13      | P16591     |
| Tetratricopeptide repeat protein                                             | 51    | 61.8  | 7       | A8MYJ7     |
| Integrator complex subunit 6                                                 | 51    | 101   | 8       | Q9UL03     |
| Protein S100-A7A                                                             | 51    | 11.4  | 5       | Q86SG5     |
| WD repeat-containing and planar cell polarity effector protein fritz homolog | 50    | 86.2  | 8       | O95876     |

| Protein Name                                                  | Score | Mass  | Matches | Access no. |
|---------------------------------------------------------------|-------|-------|---------|------------|
| 39S ribosomal protein L49, mitochondrial                      | 50    | 19.2  | 5       | Q13405     |
| B-cell antigen receptor complex-associated protein beta chain | 50    | 26.3  | 5       | P40259     |
| Translation machinery-associated protein 16                   | 50    | 24.1  | 6       | Q96EY4     |
| Dual specificity protein kinase CLK3                          | 50    | 47.3  | 8       | P49761     |
| Probable protein phosphatase 1N                               | 50    | 46.9  | 7       | Q8N819     |
| Ly6/PLAUR domain-containing protein 4                         | 49    | 27.5  | 6       | Q6UWN0     |
| Nucleoporin Nup43                                             | 49    | 42.6  | 5       | Q8NFB3     |
| Ubiquinone biosynthesis O-methyltransferase, mitochondrial    | 48    | 41.5  | 4       | Q9NZJ6     |
| Ciliogenesis-associated TTC17-interacting protein             | 48    | 44.3  | 5       | Q7Z7H3     |
| Integrator complex subunit 6                                  | 48    | 101   | 8       | Q9UL03     |
| Thrombopoietin                                                | 47    | 38    | 6       | P40225     |
| Rab GDP dissociation inhibitor beta                           | 46    | 51.1  | 7       | P50395     |
| WW domain-binding protein 5                                   | 46    | 12.8  | 6       | Q9UHQ7     |
| Multimerin-1                                                  | 45    | 139.2 | 7       | Q13201     |
| Ubiquinone biosynthesis O-methyltransferase, mitochondrial    | 45    | 41.5  | 3       | Q9NZJ6     |
| Ubiquitin/ISG15-conjugating enzyme E2 L6                      | 45    | 17.9  | 4       | O14933     |
| Myosin light chain 6B                                         | 45    | 22.9  | 5       | O14933     |
| Ganglioside-induced differentiation-associated protein 2      | 45    | 56.6  | 7       | Q9NXN4     |
| Putative uncharacterized protein encoded by COL5A1-AS1        | 44    | 6.6   | 4       | Q5SY13     |
| DNA oxidative demethylase ALKBH1                              | 44    | 44.2  | 4       | Q13686     |
| Rab GDP dissociation inhibitor beta                           | 43    | 51.1  | 8       | P50395     |
| DNA repair protein XRCC3                                      | 41    | 38.3  |         | O43542     |
| Ubiquinone biosynthesis O-methyltransferase                   | 40    | 41.5  | 4       | Q9NZJ6     |
| Glutamate receptor 2                                          | 40    | 99.4  | 7       | P42262     |
| Cystatin-S                                                    | 38    | 16.5  | 5       | P01036     |
|                                                               |       |       |         |            |
| 5'-AMP-activated protein kinase subunit gamma-2               |       | 63.2  | 7       | Q9UGJ0     |
